# Supplementary figures and images for: Differential expression of the five redox complexes in the retinal mitochondria or rod outer segment disks is consistent with their different functionality
Source: PubMed Central journal article supplement — FASEB Bioadv. 2020 Mar 31;2(5):315–24. doi: 10.1096/fba.2019-00093 (PMC7211042; doi:10.1096/fba.2019-00093), 2020-03-31

Supplemental Figure 1

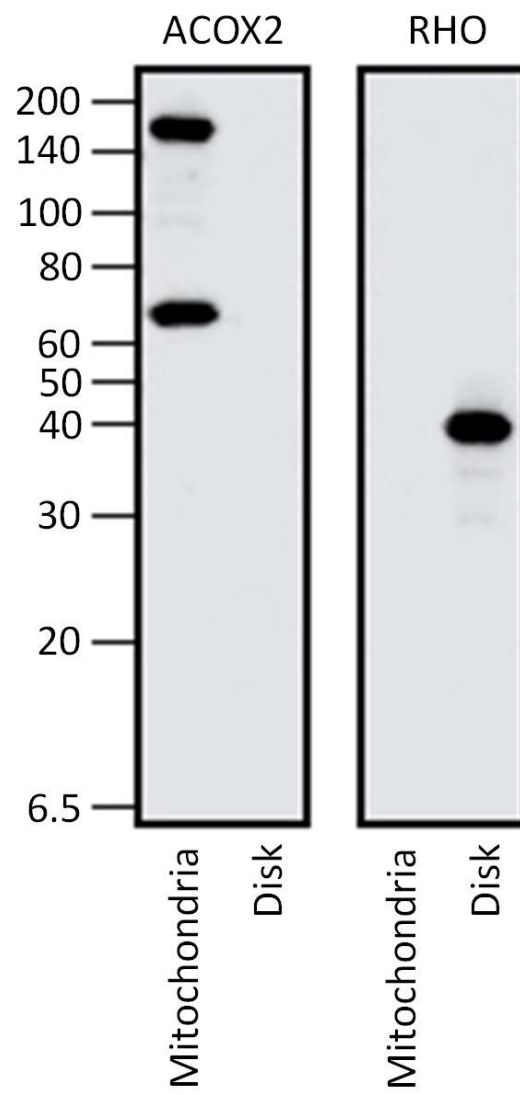

Supplement: FBA2-2-315-s001.pdf [file FBA2-2-315-s001.pdf]
